# Supplementary material
Source: Springer Nature journal article supplement (https://www.springermedizin.de/resource/supplementary/12936_2011_1746_MOESM1_ESM.pdf/9541598)
Supplement: MOESM1 [file 9541598]

# “Restricted” IPTp guidelines

Tanzanian Malaria Diagnosis and Treatment Guidelines  
Tanzanian Focused Antenatal Care Guidelines

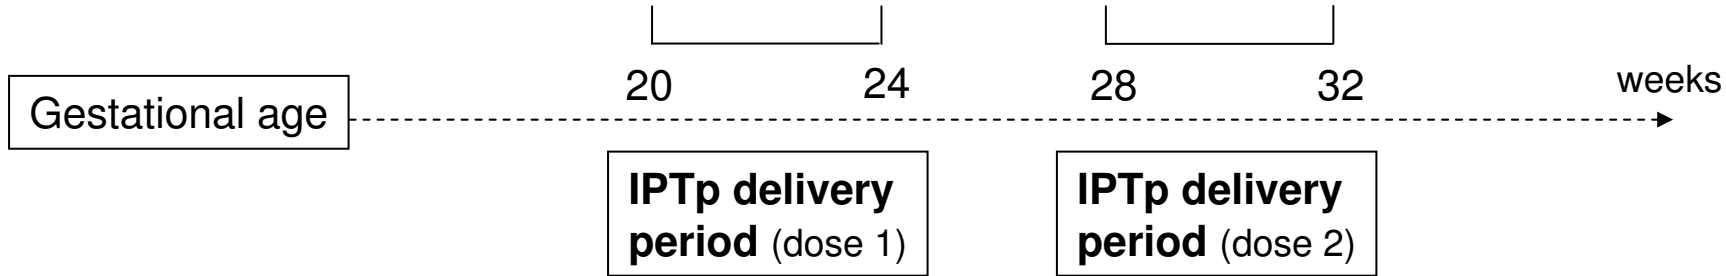

# “Simplified” IPTp guidelines

WHO IPTp Policy  
Tanzanian Focused Antenatal Care Guidelines

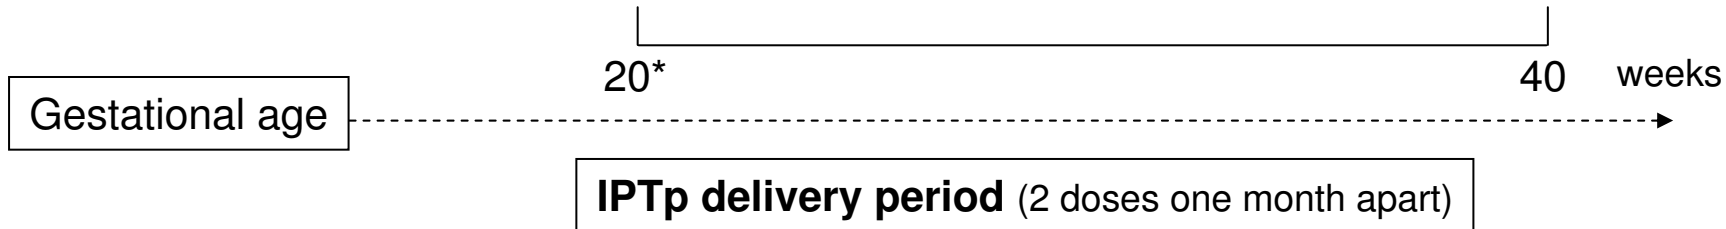

\*Assuming quickening to be at 20 weeks of gestation
